# Supplementary material for: Czech and Slovak Dental Students’ Oral Health-Related Knowledge, Attitudes, and Behaviours (KAB): Multi-Country Cross-Sectional Study
Source: MDPI journal article supplement (doi:10.3390/ijerph19052717), 2022-02-25
Supplement: s1 [file s1]

**Table S1.** Test-re-test Reliability of HU-DBI Czech Version

| <b>Item</b>                                | <b>Response</b> | <b>First Round</b> | <b>Second Round</b> | <b>Cohen's <math>\kappa</math></b>  |
|--------------------------------------------|-----------------|--------------------|---------------------|-------------------------------------|
| <b>No. 1</b>                               | Agree           | 32 / 40            | 33 / 40             | 0.754                               |
| <b>No. 2</b>                               | Disagree        | 34 / 40            | 33 / 40             | 0.908                               |
| <b>No. 3</b>                               | Agree           | 14 / 40            | 15 / 40             | 0.946                               |
| <b>No. 4</b>                               | Agree           | 9 / 40             | 10 / 40             | 0.931                               |
| <b>No. 5</b>                               | Agree           | 34 / 40            | 34 / 40             | 1.000                               |
| <b>No. 6</b>                               | Disagree        | 32 / 40            | 32 / 40             | 1.000                               |
| <b>No. 7</b>                               | Agree           | 3 / 40             | 3 / 40              | 1.000                               |
| <b>No. 8</b>                               | Disagree        | 29 / 40            | 30 / 40             | 0.935                               |
| <b>No. 9</b>                               | Agree           | 30 / 40            | 31 / 40             | 0.931                               |
| <b>No. 10</b>                              | Disagree        | 31 / 40            | 32 / 40             | 0.925                               |
| <b>No. 11</b>                              | Agree           | 21 / 40            | 22 / 40             | 0.950                               |
| <b>No. 12</b>                              | Agree           | 23 / 40            | 24 / 40             | 0.948                               |
| <b>No. 13</b>                              | Agree           | 15 / 40            | 14 / 40             | 0.946                               |
| <b>No. 14</b>                              | Disagree        | 25 / 40            | 27 / 40             | 0.781                               |
| <b>No. 15</b>                              | Disagree        | 30 / 40            | 30 / 40             | 1.000                               |
| <b>No. 16</b>                              | Agree           | 11 / 40            | 11 / 40             | 1.000                               |
| <b>No. 17</b>                              | Agree           | 4 / 40             | 5 / 40              | 0.875                               |
| <b>No. 18</b>                              | Agree           | 5 / 40             | 5 / 40              | 1.000                               |
| <b>No. 19</b>                              | Agree           | 16 / 40            | 16 / 40             | 1.000                               |
| <b>No. 20</b>                              | Agree           | 27 / 40            | 27 / 40             | 1.000                               |
| <b>Overall Cohen's <math>\kappa</math></b> |                 |                    |                     | <b>0.941 <math>\pm</math> 0.070</b> |
